# Supplementary material
Source: PubMed Central journal article supplement (PMC8511098)
Supplement: NIHMS1738951-supplement-1.pdf [file NIHMS1738951-supplement-1.pdf]

## Figure S1

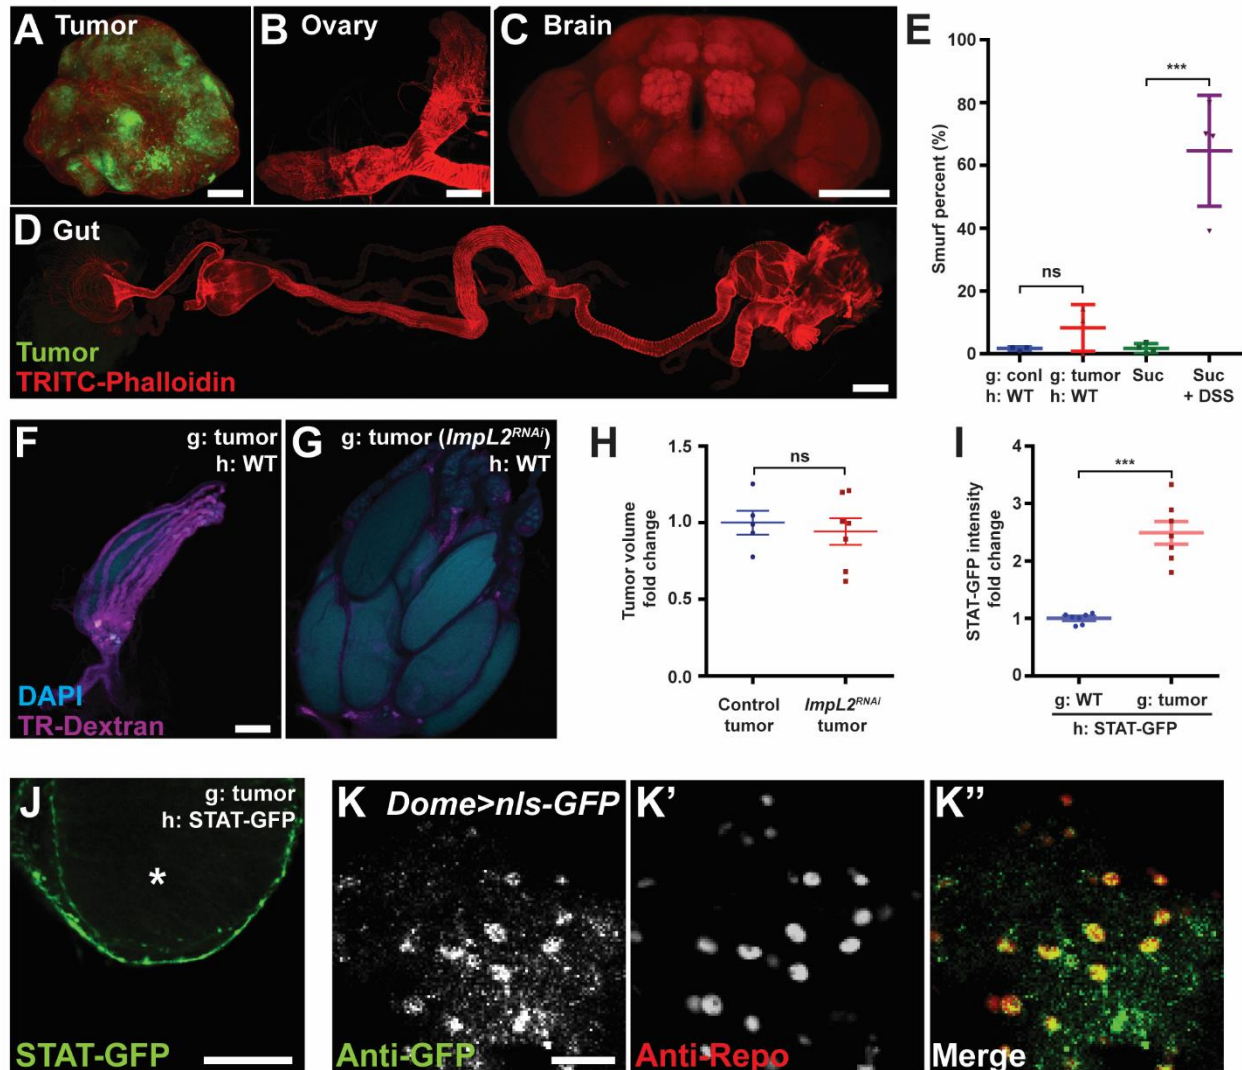

**Figure S1. Tumor-bearing fly hosts show glial Jak/STAT activation and premature death. Related to Figure 1.**

**(A-D)** GFP-marked cells from transplanted disc tumors (A) are not detectable in host tissues including the ovary (B), the brain (C), and the gut (D). Scale bar; 100  $\mu$ m. **(E)** Most tumor-bearing hosts do not show increased intestinal permeability prior to death, as detected by the 'smurf' assay; DSS-fed flies serve as positive control (>3 replicates of 20 flies each). **(F-H)** Depletion of *ImpL2* in tumors rescues ovary wasting (F, G) without affecting tumor size (H) ( $n \geq 5$  each). **(I)** Quantification of STAT reporter intensity in the optic lobe of control vs tumor hosts ( $n=7$  each). **(J)** Tumor-bearing hosts exhibit strong STAT-GFP signal at the surface of the brain (single plane image). Asterisks indicate

neuropil. Scale bar, 50  $\mu\text{m}$ . **(K)** *Dome-Gal4* driving *UAS>nls-GFP* shows expression in glial cells labeled by anti-Repo. Scale bar, 20  $\mu\text{m}$ .

Scattered plots; \* $P < 0.05$ , \*\* $P < 0.01$ , \*\*\* $P < 0.001$ , not significant (ns) $P > 0.05$ ; one-way anova (Tukey post test) for (E), Student's t-test for (H) and (I).

Figure S2

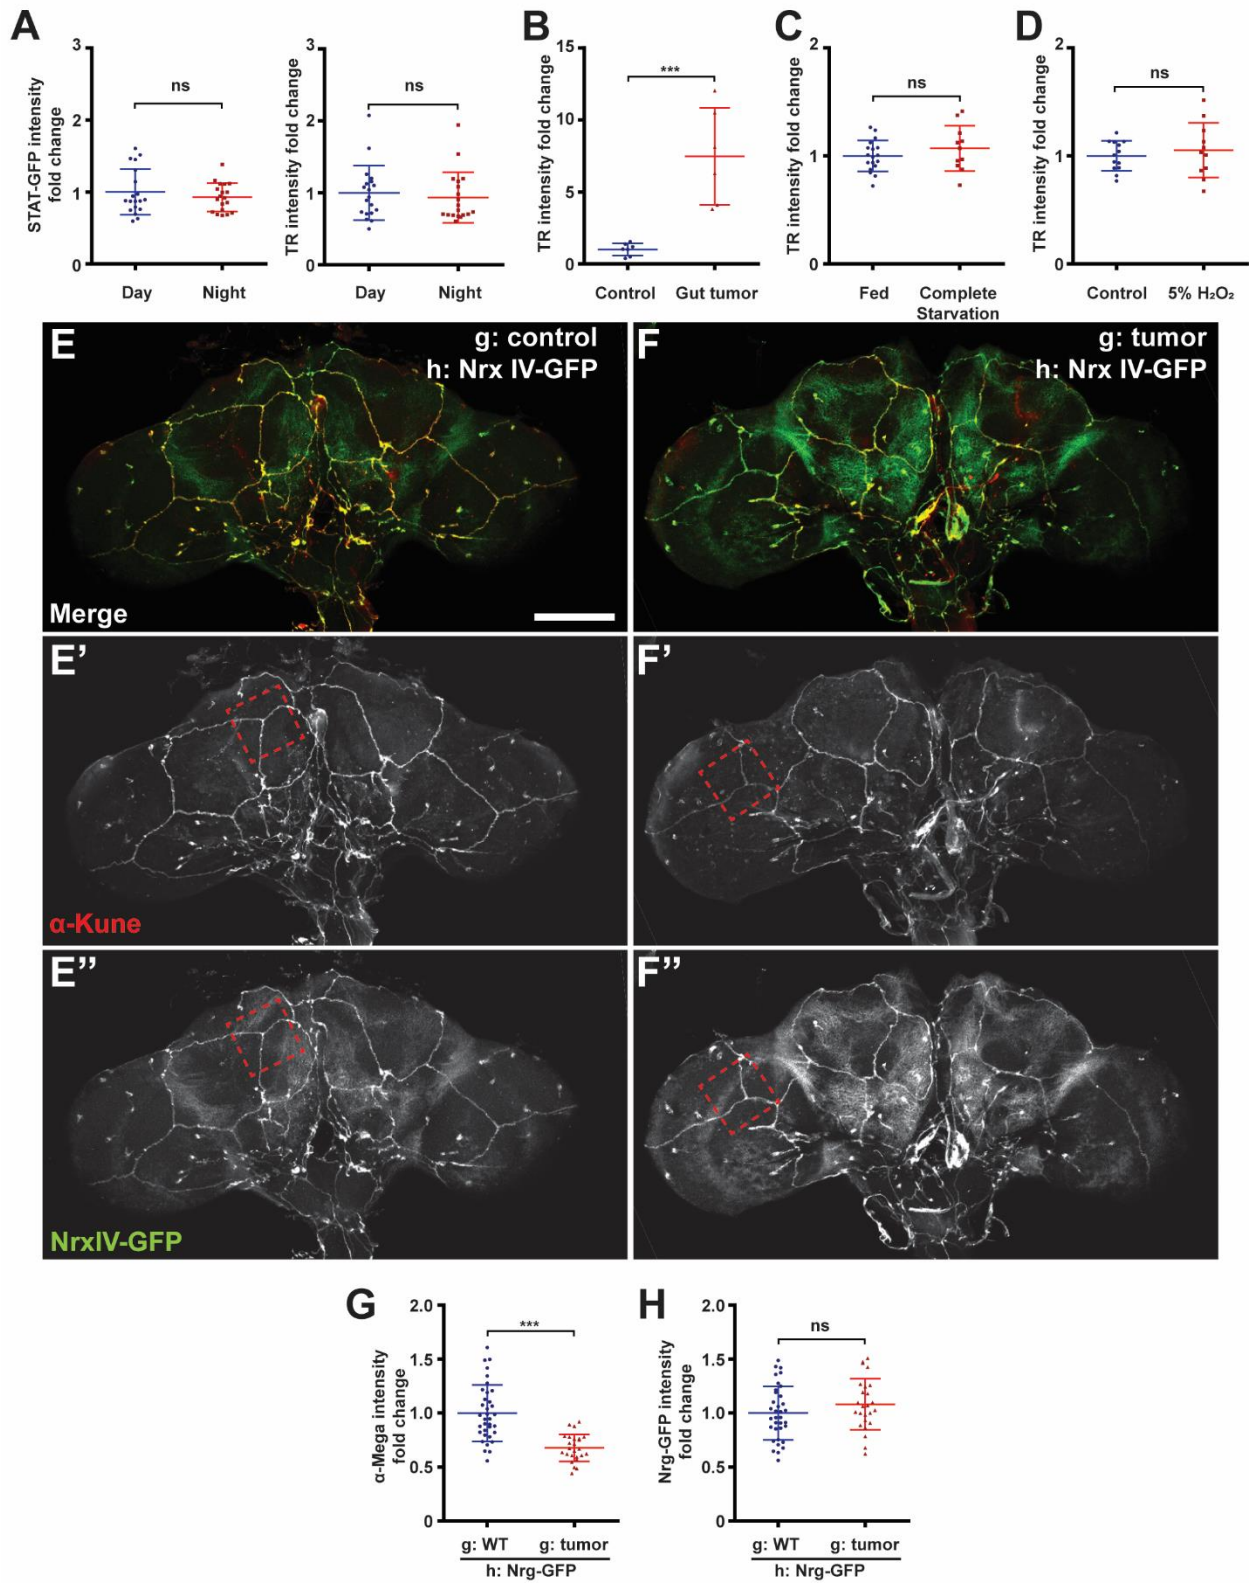

**Figure S2. Fly tumors induce BBB disruption. Related to Figure 2.**

**(A)** Neither Dextran exclusion from brain nor STAT reporter intensity are circadian regulated (n=19 each). **(B)** An adult gut tumor model driven by activated Yorkie expression in intestinal stem cells also shows BBB permeability (n=7) compared to control (n=6). **(C, D)** Complete starvation (C, fed n=18, starvation n=11) and oxidative stress (D, control n=13, H<sub>2</sub>O<sub>2</sub> n=11) do not permeabilize the BBB. **(E, F)** Images of Nr<sub>x</sub> IV-GFP brains with anti-Kune staining. Areas shown in Figure 2E and F are indicated with dotted boxes. Scale bar, 100  $\mu$ m. **(G, H)** Intensity of the claudin Mega but not the junctional transmembrane protein Nrg is decreased in the brain of tumor-bearing vs control hosts (n=25, 35).

Scattered plots; \*P<0.05, \*\*P<0.01, \*\*\*P<0.001, not significant (ns)P>0.05; Student's t-test.

# Figure S3

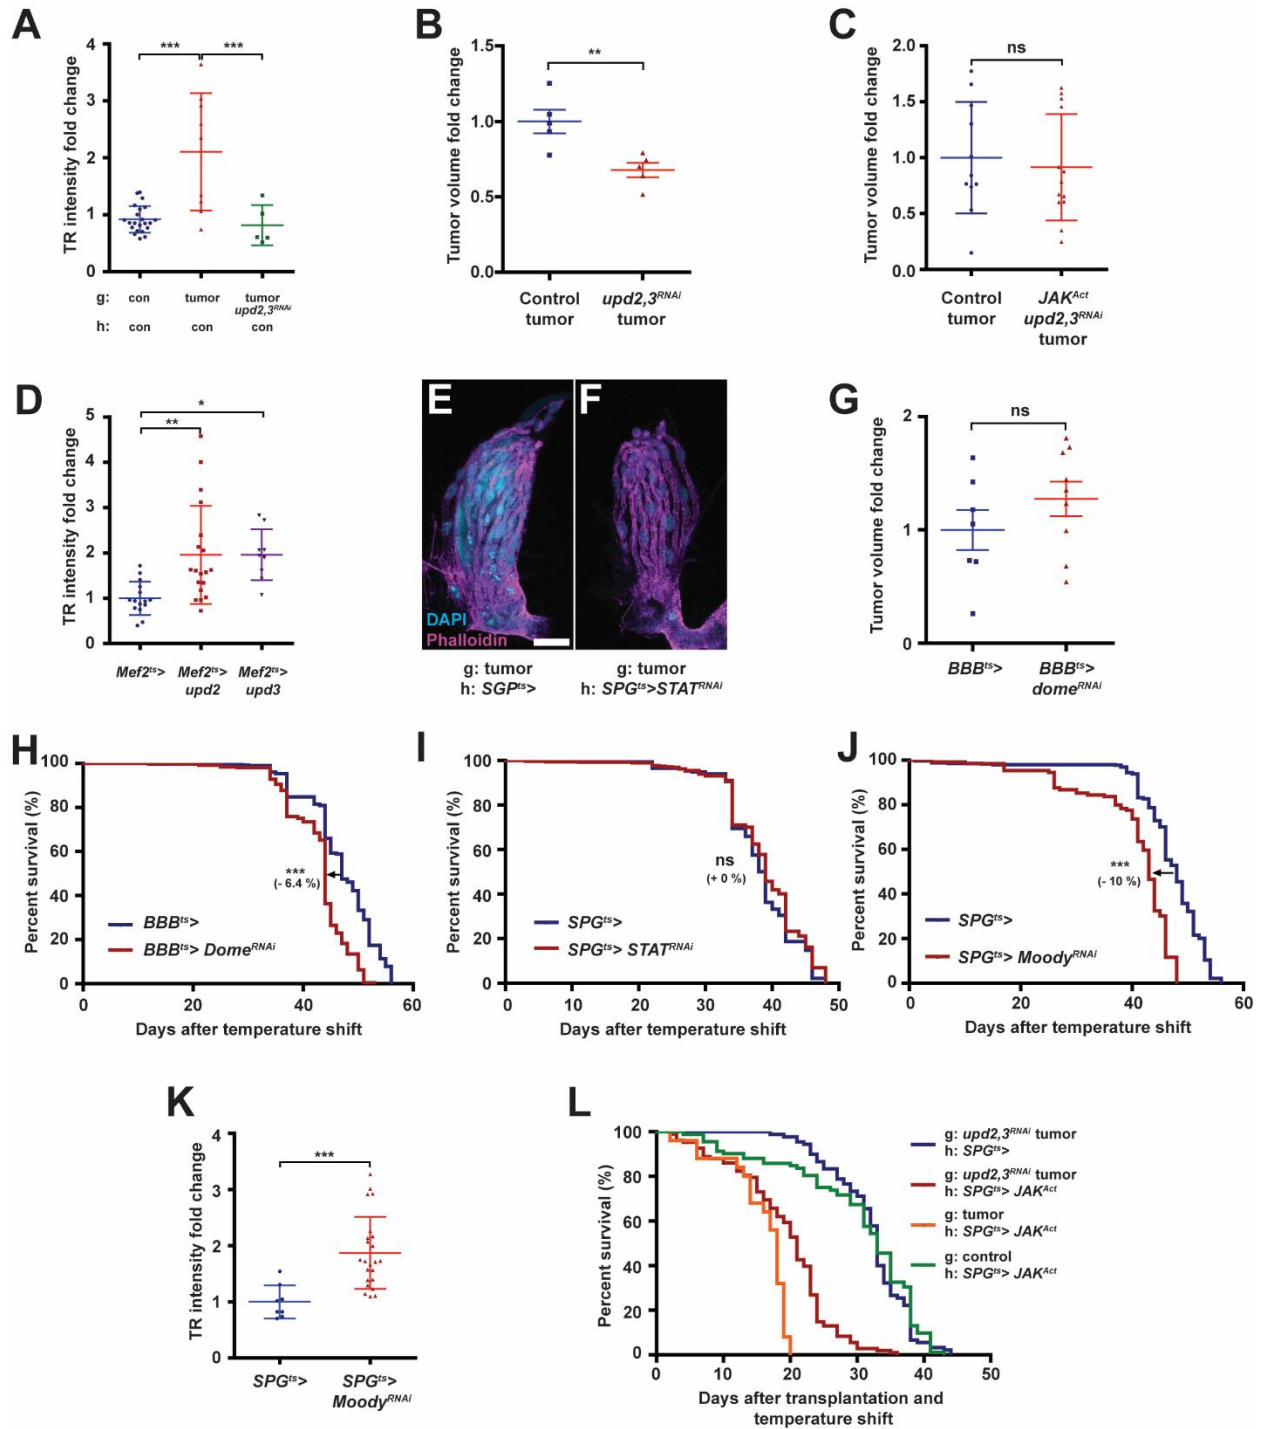

**Figure S3. Jak/STAT inhibition rescues tumor-induced BBB permeability and extends host lifespan. Related to Figure 3.**

**(A)** Compared to control (blue, n=22) and BBB compromised by tumors (red, n=9), BBB permeability is rescued when hosts bear tumors depleted of *upd2/3* (green, n=5). **(B)** *upd2/3<sup>RNAi</sup>* tumors are smaller than control tumors (n=5 each). **(C)** Size of *UAS-JAK<sup>ACT</sup>, upd2/3<sup>RNAi</sup>* tumors (red, n=13) is similar to control tumors (blue, n=10). **(D)** Ectopic expression of *upd2* (red, n=19) or *upd3* (purple, n=9) in muscle is sufficient to permeabilize BBB compared to control (blue, n=15). **(E, F)** Wasting is not rescued when STAT signaling is blocked within the SPG of tumor hosts; compare to control in Fig. S1F. Scale bar, 100  $\mu$ m. **(G)** Tumor size is not changed when STAT signaling blocked in BBB (red, n=9) compared to control (blue, n=7). **(H, I)** Depletion of Dome in the BBB (H) (red, n=253) or depletion of STAT in SPG (I) (red, n=429) did not extend lifespan without tumors (blue, n=282 and n=535, respectively). **(J)** Depletion of Moody in SPG cells (red, n= 129) causes only a modest and late-acting reduction in lifespan compared to control (blue, n=358). **(K)** BBB becomes permeable 5 days after induction of Moody depletion in SPG (red, n=23) compared to control (blue, n=8). **(L)** *upd2,3*-depleted tumors reduced lifespan of BBB-compromised hosts (red, n=108) compared to control hosts (blue, n=90). This reduced lifespan is longer than BBB-compromised hosts with regular tumors (orange, n=25) and shorter than BBB-compromised hosts with WT tissue (purple, n=92).

Scattered plots; \*P<0.05, \*\*P<0.01, \*\*\*P<0.001, not significant (ns)P>0.05; one-way anova (Tukey post test) for (A) and (D), Student's t-test for (B), (C), (G), and (K). Lifespan curves; \*P<0.05, \*\*P<0.01, \*\*\*P<0.001, not significant (ns)P>0.05; Log-rank test. Error bar represents mean $\pm$ s.d of normalized values to control.

## Figure S4

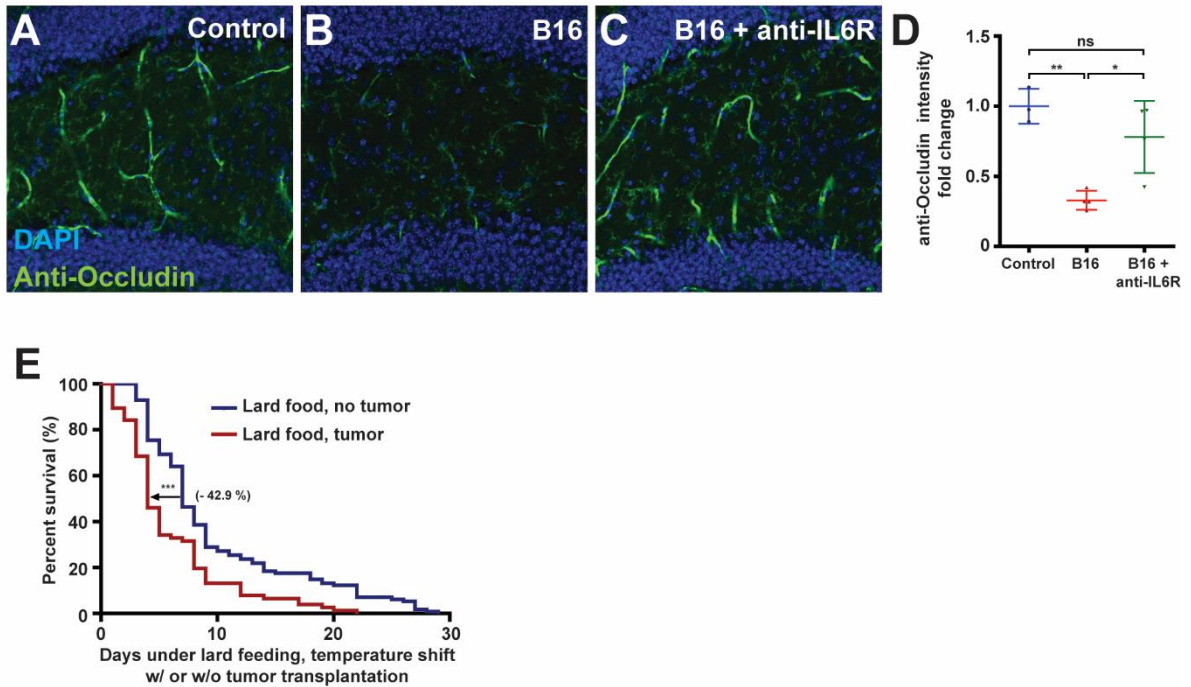

**Figure S4. Paraneoplastic BBB breakdown in an IL-6-inducing mouse tumor model. Related to Figure 5 and Discussion.**

**(A-D)** Compared to control (A, n=3), brains of tumor-bearing mice (B, n=4) show decreased staining of the endothelial tight junction component Occludin. This phenotype is reversed when tumor-bearing mice are treated with anti-IL-6R antibody (C, n=4). (D) shows quantitation.

**(E)** Lard-fed hosts with tumor transplants (red, n=76) show accelerated mortality compared to lard-fed hosts with mock transplants (blue, n=114).

Scattered plots; \*P<0.05, \*\*P<0.01, \*\*\*P<0.001, not significant (ns)P>0.05; one-way anova (Tukey post test). Lifespan curves; \*P<0.05, \*\*P<0.01, \*\*\*P<0.001, not significant (ns)P>0.05; Log-rank test. Error bar represents mean±s.d of normalized values to control.

**Table S1. Detailed genotypes, related to the STAR Methods and to all figures**

| Figure                                                                                     | Panel                                                                                                                                                                                 | Genotype                                                                                                                                                                                                                                |
|--------------------------------------------------------------------------------------------|---------------------------------------------------------------------------------------------------------------------------------------------------------------------------------------|-----------------------------------------------------------------------------------------------------------------------------------------------------------------------------------------------------------------------------------------|
| 1                                                                                          | A                                                                                                                                                                                     | <i>Nub-Gal4, Tub-Gal80<sup>ts</sup>; UAS-aPKC<sup>ΔN</sup>, UAS-Ras<sup>V12</sup></i><br><i>Blue g: w<sup>1118</sup>//h: w<sup>1118</sup></i>                                                                                           |
|                                                                                            | B                                                                                                                                                                                     | <i>Red g: Nub-Gal4, Tub-Gal80<sup>ts</sup>/+; UAS-aPKC<sup>ΔN</sup>, UAS-Ras<sup>V12</sup>/+//h: w<sup>1118</sup></i>                                                                                                                   |
|                                                                                            |                                                                                                                                                                                       | <i>Green g: Nub-Gal4, Tub-Gal80<sup>ts</sup>/+; UAS-aPKC<sup>ΔN</sup>, UAS-Ras<sup>V12</sup>/impl2<sup>RNAi</sup>//h: w<sup>1118</sup></i>                                                                                              |
|                                                                                            | C                                                                                                                                                                                     | <i>g: w<sup>1118</sup>//h: 10xSTAT92E-GFP/10xSTAT92E-GFP; +/+</i>                                                                                                                                                                       |
|                                                                                            | D                                                                                                                                                                                     | <i>g: Nub-Gal4, Tub-Gal80<sup>ts</sup>/+; UAS-aPKC<sup>ΔN</sup>, UAS-Ras<sup>V12</sup>/+//h: 10xSTAT92E-GFP/10xSTAT92E-GFP; +/+</i>                                                                                                     |
|                                                                                            | E                                                                                                                                                                                     | <i>g: w<sup>1118</sup>//h: 10xSTAT92E-GFP/10xSTAT92E-GFP; +/+</i>                                                                                                                                                                       |
|                                                                                            | F                                                                                                                                                                                     | <i>g: Nub-Gal4, Tub-Gal80<sup>ts</sup>/+; UAS-aPKC<sup>ΔN</sup>, UAS-Ras<sup>V12</sup>/+//h: 10xSTAT92E-GFP/10xSTAT92E-GFP; +/+</i>                                                                                                     |
| 2                                                                                          | G                                                                                                                                                                                     | <i>g: Nub-Gal4, Tub-Gal80<sup>ts</sup>/+; UAS-aPKC<sup>ΔN</sup>, UAS-Ras<sup>V12</sup>/+//h: 10xSTAT92E-GFP/10xSTAT92E-GFP; +/+</i>                                                                                                     |
|                                                                                            | A                                                                                                                                                                                     | <i>g: w<sup>1118</sup>//h: w<sup>1118</sup></i>                                                                                                                                                                                         |
|                                                                                            | B                                                                                                                                                                                     | <i>g: Nub-Gal4, Tub-Gal80<sup>ts</sup>/+; UAS-aPKC<sup>ΔN</sup>, UAS-Ras<sup>V12</sup>/+//h: w<sup>1118</sup></i><br><i>Blue g: w<sup>1118</sup>//h: w<sup>1118</sup></i>                                                               |
|                                                                                            | C                                                                                                                                                                                     | <i>Red g: Nub-Gal4, Tub-Gal80<sup>ts</sup>/+; UAS-aPKC<sup>ΔN</sup>, UAS-Ras<sup>V12</sup>/+//h: w<sup>1118</sup></i>                                                                                                                   |
|                                                                                            |                                                                                                                                                                                       | <i>g: Nub-Gal4, Tub-Gal80<sup>ts</sup>/+; UAS-aPKC<sup>ΔN</sup>, UAS-Ras<sup>V12</sup>/+//h: w<sup>1118</sup></i>                                                                                                                       |
|                                                                                            | D                                                                                                                                                                                     | <i>g: Nub-Gal4, Tub-Gal80<sup>ts</sup>/+; UAS-aPKC<sup>ΔN</sup>, UAS-Ras<sup>V12</sup>/+//h: w<sup>1118</sup></i>                                                                                                                       |
|                                                                                            | E                                                                                                                                                                                     | <i>g: PBS//h: +/+; Nr1V-GFP/ Nr1V-GFP</i>                                                                                                                                                                                               |
| F                                                                                          | <i>g: Nub-Gal4, Tub-Gal80<sup>ts</sup>/+; UAS-aPKC<sup>ΔN</sup>, UAS-Ras<sup>V12</sup>/+//h: +/+; Nr1V-GFP/ Nr1V-GFP</i><br><i>Blue g: PBS//h: +/+; Nr1V-GFP/ Nr1V-GFP</i>            |                                                                                                                                                                                                                                         |
| 3                                                                                          | G, H                                                                                                                                                                                  | <i>Red g: Nub-Gal4, Tub-Gal80<sup>ts</sup>/+; UAS-aPKC<sup>ΔN</sup>, UAS-Ras<sup>V12</sup>/+//h: +/+; Nr1V-GFP/ Nr1V-GFP</i>                                                                                                            |
|                                                                                            |                                                                                                                                                                                       | <i>g: Nub-Gal4, Tub-Gal80<sup>ts</sup>/+; UAS-aPKC<sup>ΔN</sup>, UAS-Ras<sup>V12</sup>/+//h: w<sup>1118</sup></i>                                                                                                                       |
|                                                                                            | A                                                                                                                                                                                     | <i>g: Nub-Gal4, Tub-Gal80<sup>ts</sup>/+; UAS-aPKC<sup>ΔN</sup>, UAS-Ras<sup>V12</sup>/+//h: w<sup>1118</sup></i>                                                                                                                       |
|                                                                                            | B                                                                                                                                                                                     | <i>g: Nub-Gal4, Tub-Gal80<sup>ts</sup>/+; UAS-aPKC<sup>ΔN</sup>, UAS-Ras<sup>V12</sup>/+//h: upd2<sup>Δ</sup>,3<sup>Δ</sup>/upd2<sup>Δ</sup>,3<sup>Δ</sup>; +/+; +/+</i>                                                                |
|                                                                                            | C                                                                                                                                                                                     | <i>g: UAS-Hop<sup>TumL</sup>/+; Nub-Gal4, Tub-Gal80<sup>ts</sup>/upd3<sup>RNAi</sup>; UAS-aPKC<sup>ΔN</sup>, UAS-Ras<sup>V12</sup>/upd2<sup>RNAi</sup>//h: w<sup>1118</sup></i><br><i>Blue g: w<sup>1118</sup>//h: w<sup>1118</sup></i> |
|                                                                                            | D                                                                                                                                                                                     | <i>Red g: Nub-Gal4, Tub-Gal80<sup>ts</sup>/+; UAS-aPKC<sup>ΔN</sup>, UAS-Ras<sup>V12</sup>/+//h: w<sup>1118</sup></i>                                                                                                                   |
|                                                                                            |                                                                                                                                                                                       | <i>Purple g: Nub-Gal4, Tub-Gal80<sup>ts</sup>/+; UAS-aPKC<sup>ΔN</sup>, UAS-Ras<sup>V12</sup>/+//h: upd2<sup>Δ</sup>,3<sup>Δ</sup>/upd2<sup>Δ</sup>,3<sup>Δ</sup>; +/+; +/+</i>                                                         |
|                                                                                            |                                                                                                                                                                                       | <i>Green g: UAS-Hop<sup>TumL</sup>/+; Nub-Gal4, Tub-Gal80<sup>ts</sup>/upd3<sup>RNAi</sup>; UAS-aPKC<sup>ΔN</sup>, UAS-Ras<sup>V12</sup>/upd2<sup>RNAi</sup>//h: w<sup>1118</sup></i>                                                   |
|                                                                                            | E                                                                                                                                                                                     | <i>g: Nub-Gal4, Tub-Gal80<sup>ts</sup>/+; UAS-aPKC<sup>ΔN</sup>, UAS-Ras<sup>V12</sup>/+//h: 9-137-Gal4/+; Tub-Gal80<sup>ts</sup>/+</i>                                                                                                 |
|                                                                                            | F                                                                                                                                                                                     | <i>g: Nub-Gal4, Tub-Gal80<sup>ts</sup>/+; UAS-aPKC<sup>ΔN</sup>, UAS-Ras<sup>V12</sup>/+//h: 9-137-Gal4/Dome<sup>RNAi</sup>; Tub-Gal80<sup>ts</sup>/+</i><br><i>Blue g: PBS//h: 9-137-Gal4/+; Tub-Gal80<sup>ts</sup>/+</i>              |
|                                                                                            | G                                                                                                                                                                                     | <i>Red g: Nub-Gal4, Tub-Gal80<sup>ts</sup>/+; UAS-aPKC<sup>ΔN</sup>, UAS-Ras<sup>V12</sup>/+//h: 9-137-Gal4/+; Tub-Gal80<sup>ts</sup>/+</i>                                                                                             |
|                                                                                            |                                                                                                                                                                                       | <i>Green g: Nub-Gal4, Tub-Gal80<sup>ts</sup>/+; UAS-aPKC<sup>ΔN</sup>, UAS-Ras<sup>V12</sup>/+//h: 9-137-Gal4/Dome<sup>RNAi</sup>; Tub-Gal80<sup>ts</sup>/+</i>                                                                         |
|                                                                                            | H                                                                                                                                                                                     | <i>Blue g: PBS//h: Tub-Gal80<sup>ts</sup>/+; Moody-Gal4/+</i>                                                                                                                                                                           |
|                                                                                            |                                                                                                                                                                                       | <i>Red g: Nub-Gal4, Tub-Gal80<sup>ts</sup>/+; UAS-aPKC<sup>ΔN</sup>, UAS-Ras<sup>V12</sup>/+//h: Tub-Gal80<sup>ts</sup>/+; Moody-Gal4/+</i>                                                                                             |
|                                                                                            |                                                                                                                                                                                       | <i>Green g: Nub-Gal4, Tub-Gal80<sup>ts</sup>/+; UAS-aPKC<sup>ΔN</sup>, UAS-Ras<sup>V12</sup>/+//h: Tub-Gal80<sup>ts</sup>/Dome<sup>RNAi</sup>; Moody-Gal4/+</i>                                                                         |
|                                                                                            |                                                                                                                                                                                       | <i>Purple g: Nub-Gal4, Tub-Gal80<sup>ts</sup>/+; UAS-aPKC<sup>ΔN</sup>, UAS-Ras<sup>V12</sup>/+//h: STAT<sup>RNAi</sup>/+; Tub-Gal80<sup>ts</sup>/STAT<sup>RNAi</sup>; Moody-Gal4/+</i>                                                 |
|                                                                                            | I                                                                                                                                                                                     | <i>Blue +/+; Tub-Gal80<sup>ts</sup>/+; Moody-Gal4/+</i>                                                                                                                                                                                 |
| <i>Red UAS-Hop<sup>TumL</sup>/+; Tub-Gal80<sup>ts</sup>/+; Moody-Gal4/+</i>                |                                                                                                                                                                                       |                                                                                                                                                                                                                                         |
| J                                                                                          | <i>Blue g: Nub-Gal4, Tub-Gal80<sup>ts</sup>/+; UAS-aPKC<sup>ΔN</sup>, UAS-Ras<sup>V12</sup>/+//h: 9-137-Gal4/+; Tub-Gal80<sup>ts</sup>/+</i>                                          |                                                                                                                                                                                                                                         |
| K                                                                                          | <i>Red g: Nub-Gal4, Tub-Gal80<sup>ts</sup>/+; UAS-aPKC<sup>ΔN</sup>, UAS-Ras<sup>V12</sup>/+//h: 9-137-Gal4/Dome<sup>RNAi</sup>; Tub-Gal80<sup>ts</sup>/+</i>                         |                                                                                                                                                                                                                                         |
|                                                                                            | <i>Blue g: Nub-Gal4, Tub-Gal80<sup>ts</sup>/+; UAS-aPKC<sup>ΔN</sup>, UAS-Ras<sup>V12</sup>/+//h: +/+; Tub-Gal80<sup>ts</sup>/+; Moody-Gal4/mCh<sup>RNAi</sup></i>                    |                                                                                                                                                                                                                                         |
| L                                                                                          | <i>Red g: Nub-Gal4, Tub-Gal80<sup>ts</sup>/+; UAS-aPKC<sup>ΔN</sup>, UAS-Ras<sup>V12</sup>/+//h: STAT<sup>RNAi</sup>/+; Tub-Gal80<sup>ts</sup>/STAT<sup>RNAi</sup>; Moody-Gal4/+</i>  |                                                                                                                                                                                                                                         |
|                                                                                            | <i>Blue g: Nub-Gal4, Tub-Gal80<sup>ts</sup>/+; UAS-aPKC<sup>ΔN</sup>, UAS-Ras<sup>V12</sup>/+//h: w<sup>1118</sup></i>                                                                |                                                                                                                                                                                                                                         |
|                                                                                            | <i>Red g: Nub-Gal4, Tub-Gal80<sup>ts</sup>/+; UAS-aPKC<sup>ΔN</sup>, UAS-Ras<sup>V12</sup>/+//h: upd2<sup>Δ</sup>,3<sup>Δ</sup>/upd2<sup>Δ</sup>,3<sup>Δ</sup>; +/+; +/+</i>          |                                                                                                                                                                                                                                         |
| M                                                                                          | <i>Green g: UAS-Hop<sup>TumL</sup>/+; Nub-Gal4, Tub-Gal80<sup>ts</sup>/upd3<sup>RNAi</sup>; UAS-aPKC<sup>ΔN</sup>, UAS-Ras<sup>V12</sup>/upd2<sup>RNAi</sup>//h: w<sup>1118</sup></i> |                                                                                                                                                                                                                                         |
|                                                                                            | <i>Blue +/+; Tub-Gal80<sup>ts</sup>/+; Moody-Gal4/+</i><br><i>Red UAS-Hop<sup>TumL</sup>/+; Tub-Gal80<sup>ts</sup>/+; Moody-Gal4/+</i>                                                |                                                                                                                                                                                                                                         |
| 4                                                                                          | A                                                                                                                                                                                     | <i>10xSTAT92E-GFP/10xSTAT92E-GFP; +/+</i>                                                                                                                                                                                               |
|                                                                                            | B                                                                                                                                                                                     | <i>10xSTAT92E-GFP/10xSTAT92E-GFP; +/+</i>                                                                                                                                                                                               |
|                                                                                            | C                                                                                                                                                                                     | <i>10xSTAT92E-GFP/10xSTAT92E-GFP; +/+</i>                                                                                                                                                                                               |
|                                                                                            | D - G                                                                                                                                                                                 | <i>Blue 10xSTAT92E-GFP/10xSTAT92E-GFP; +/+</i>                                                                                                                                                                                          |
|                                                                                            |                                                                                                                                                                                       | <i>Red 10xSTAT92E-GFP/10xSTAT92E-GFP; +/+</i>                                                                                                                                                                                           |
|                                                                                            | H, I                                                                                                                                                                                  | <i>+/+; Nr1V-GFP/ Nr1V-GFP</i>                                                                                                                                                                                                          |
|                                                                                            | J                                                                                                                                                                                     | <i>Blue 10xSTAT92E-GFP/10xSTAT92E-GFP; +/+</i>                                                                                                                                                                                          |
|                                                                                            |                                                                                                                                                                                       | <i>Red 10xSTAT92E-GFP/10xSTAT92E-GFP; +/+</i>                                                                                                                                                                                           |
|                                                                                            |                                                                                                                                                                                       | <i>Green 10xSTAT92E-GFP/10xSTAT92E-GFP; +/+</i>                                                                                                                                                                                         |
|                                                                                            | K                                                                                                                                                                                     | <i>Blue +/+; Tub-Gal80<sup>ts</sup>/+; Moody-Gal4/+</i>                                                                                                                                                                                 |
| <i>Red STAT<sup>RNAi</sup>/+; Tub-Gal80<sup>ts</sup>/STAT<sup>RNAi</sup>; Moody-Gal4/+</i> |                                                                                                                                                                                       |                                                                                                                                                                                                                                         |
| L                                                                                          | <i>Blue +/+; Tub-Gal80<sup>ts</sup>/+; Moody-Gal4/+</i><br><i>Red STAT<sup>RNAi</sup>/+; Tub-Gal80<sup>ts</sup>/STAT<sup>RNAi</sup>; Moody-Gal4/+</i>                                 |                                                                                                                                                                                                                                         |
| 5                                                                                          | A                                                                                                                                                                                     | <i>g: PBS//h: C57BL/6J</i>                                                                                                                                                                                                              |
|                                                                                            | B                                                                                                                                                                                     | <i>g: B16-F10//h: C57BL/6J// treatment: PBS</i>                                                                                                                                                                                         |
|                                                                                            | C                                                                                                                                                                                     | <i>g: B16-F10//h: C57BL/6J// treatment: anti-IL6R</i>                                                                                                                                                                                   |
|                                                                                            | D                                                                                                                                                                                     | <i>Blue g: PBS//h: C57BL/6J</i><br><i>Red g: B16-F10//h: C57BL/6J// treatment: PBS</i>                                                                                                                                                  |



|      |                                                                                                                                 |                                                                                                                                                                                                                                                                                                                                                                                                                   |
|------|---------------------------------------------------------------------------------------------------------------------------------|-------------------------------------------------------------------------------------------------------------------------------------------------------------------------------------------------------------------------------------------------------------------------------------------------------------------------------------------------------------------------------------------------------------------|
|      |                                                                                                                                 | Green g: B16-F10// h: C57BL/6J// treatment: anti-IL6R                                                                                                                                                                                                                                                                                                                                                             |
|      | E                                                                                                                               | g: PBS// h: C57BL/6J                                                                                                                                                                                                                                                                                                                                                                                              |
|      | F                                                                                                                               | g: B16-F10// h: C57BL/6J// treatment: PBS                                                                                                                                                                                                                                                                                                                                                                         |
|      | G                                                                                                                               | g: B16-F10// h: C57BL/6J// treatment: anti-IL6R                                                                                                                                                                                                                                                                                                                                                                   |
|      | H                                                                                                                               | Blue g: PBS// h: C57BL/6J<br>Red g: B16-F10// h: C57BL/6J// treatment: PBS<br>Green g: B16-F10// h: C57BL/6J// treatment: anti-IL6R                                                                                                                                                                                                                                                                               |
|      | I                                                                                                                               | g: PBS// h: C57BL/6J                                                                                                                                                                                                                                                                                                                                                                                              |
|      | J                                                                                                                               | g: B16-F10// h: C57BL/6J// treatment: PBS                                                                                                                                                                                                                                                                                                                                                                         |
|      | K                                                                                                                               | g: B16-F10// h: C57BL/6J// treatment: anti-IL6R                                                                                                                                                                                                                                                                                                                                                                   |
|      | L                                                                                                                               | Blue g: PBS// h: C57BL/6J<br>Red g: B16-F10// h: C57BL/6J// treatment: PBS<br>Green g: B16-F10// h: C57BL/6J// treatment: anti-IL6R                                                                                                                                                                                                                                                                               |
| 6    | A                                                                                                                               | Blue g: PBS// h: C57BL/6J<br>Red g: B16-F10// h: C57BL/6J                                                                                                                                                                                                                                                                                                                                                         |
|      | B                                                                                                                               | Red g: B16-F10// h: C57BL/6J// treatment: PBS<br>Green g: B16-F10// h: C57BL/6J// treatment: anti-IL6R                                                                                                                                                                                                                                                                                                            |
|      | C                                                                                                                               | Blue g: PBS// h: C57BL/6J<br>Red g: B16-F10// h: C57BL/6J// treatment: PBS<br>Green g: B16-F10// h: C57BL/6J// treatment: anti-IL6R                                                                                                                                                                                                                                                                               |
|      | D                                                                                                                               | Blue g: PBS// h: C57BL/6J<br>Red g: B16-F10// h: C57BL/6J// treatment: PBS<br>Green g: B16-F10// h: C57BL/6J// treatment: anti-IL6R                                                                                                                                                                                                                                                                               |
|      | A-D                                                                                                                             | g: Nub-Gal4, Tub-Gal80 <sup>ts/+</sup> ; UAS-aPKC <sup>ΔN</sup> , UAS-Ras <sup>V12</sup> /10x UAS-mCD8-GFP// h: w <sup>1118</sup><br>Blue g: PBS// h: w <sup>1118</sup>                                                                                                                                                                                                                                           |
|      | E                                                                                                                               | Red g: Nub-Gal4, Tub-Gal80 <sup>ts/+</sup> ; UAS-aPKC <sup>ΔN</sup> , UAS-Ras <sup>V12</sup> /+// h: w <sup>1118</sup><br>Green and purple g: PBS// h: w <sup>1118</sup>                                                                                                                                                                                                                                          |
|      | F                                                                                                                               | g: Nub-Gal4, Tub-Gal80 <sup>ts/+</sup> ; UAS-aPKC <sup>ΔN</sup> , UAS-Ras <sup>V12</sup> /+// h: w <sup>1118</sup>                                                                                                                                                                                                                                                                                                |
|      | G                                                                                                                               | g: Nub-Gal4, Tub-Gal80 <sup>ts/+</sup> ; UAS-aPKC <sup>ΔN</sup> , UAS-Ras <sup>V12</sup> /impL2 <sup>RNAi</sup> // h: w <sup>1118</sup><br>Blue g: Nub-Gal4, Tub-Gal80 <sup>ts/+</sup> ; UAS-aPKC <sup>ΔN</sup> , UAS-Ras <sup>V12</sup> /+// h: w <sup>1118</sup><br>Red g: Nub-Gal4, Tub-Gal80 <sup>ts/+</sup> ; UAS-aPKC <sup>ΔN</sup> , UAS-Ras <sup>V12</sup> /impL2 <sup>RNAi</sup> // h: w <sup>1118</sup> |
| S1   | I                                                                                                                               | Blue g: w <sup>1118</sup> // h: 10xSTAT92E-GFP/10xSTAT92E-GFP; +/+<br>Red g: Nub-Gal4, Tub-Gal80 <sup>ts/+</sup> ; UAS-aPKC <sup>ΔN</sup> , UAS-Ras <sup>V12</sup> /+// h: 10xSTAT92E-GFP/10xSTAT92E-GFP; +/+                                                                                                                                                                                                     |
|      | J                                                                                                                               | g: Nub-Gal4, Tub-Gal80 <sup>ts/+</sup> ; UAS-aPKC <sup>ΔN</sup> , UAS-Ras <sup>V12</sup> /+// h: 10xSTAT92E-GFP/10xSTAT92E-GFP; +/+                                                                                                                                                                                                                                                                               |
|      | K                                                                                                                               | Dome-Gal4/+; UAS-nls-GFP/+; +/+                                                                                                                                                                                                                                                                                                                                                                                   |
|      | A                                                                                                                               | Blue 10xSTAT92E-GFP/10xSTAT92E-GFP; +/+<br>Red 10xSTAT92E-GFP/10xSTAT92E-GFP; +/+                                                                                                                                                                                                                                                                                                                                 |
|      | B                                                                                                                               | Blue Esg-Gal4, UAS-GFP/+; Tub-Gal80 <sup>ts/+</sup><br>Red Esg-Gal4, UAS-GFP/+; Tub-Gal80 <sup>ts</sup> /UAS-ykr <sup>3SA</sup>                                                                                                                                                                                                                                                                                   |
|      | C, D                                                                                                                            | Blue and red W <sup>1118</sup>                                                                                                                                                                                                                                                                                                                                                                                    |
|      | E                                                                                                                               | g: PBS// h: +/+; NrXIV-GFP/ NrXIV-GFP                                                                                                                                                                                                                                                                                                                                                                             |
|      | F                                                                                                                               | g: Nub-Gal4, Tub-Gal80 <sup>ts/+</sup> ; UAS-aPKC <sup>ΔN</sup> , UAS-Ras <sup>V12</sup> /+// h: +/+; NrXIV-GFP/ NrXIV-GFP<br>Blue g: PBS// h: Nrg-GFP/ Nrg-GFP; +/+; +/+                                                                                                                                                                                                                                         |
| G, H | Red g: Nub-Gal4, Tub-Gal80 <sup>ts/+</sup> ; UAS-aPKC <sup>ΔN</sup> , UAS-Ras <sup>V12</sup> /+// h: Nrg-GFP/ Nrg-GFP; +/+; +/+ |                                                                                                                                                                                                                                                                                                                                                                                                                   |
| S3   | A                                                                                                                               | Blue g: PBS// h: w <sup>1118</sup><br>Red g: Nub-Gal4, Tub-Gal80 <sup>ts/+</sup> ; UAS-aPKC <sup>ΔN</sup> , UAS-Ras <sup>V12</sup> /+// h: w <sup>1118</sup><br>Green g: Nub-Gal4, Tub-Gal80 <sup>ts</sup> /upd3 <sup>RNAi</sup> ; UAS-aPKC <sup>ΔN</sup> , UAS-Ras <sup>V12</sup> /upd2 <sup>RNAi</sup> // h: w <sup>1118</sup>                                                                                  |
|      | B                                                                                                                               | Blue g: Nub-Gal4, Tub-Gal80 <sup>ts/+</sup> ; UAS-aPKC <sup>ΔN</sup> , UAS-Ras <sup>V12</sup> /+// h: w <sup>1118</sup><br>Red g: Nub-Gal4, Tub-Gal80 <sup>ts</sup> /upd3 <sup>RNAi</sup> ; UAS-aPKC <sup>ΔN</sup> , UAS-Ras <sup>V12</sup> /upd2 <sup>RNAi</sup> // h: w <sup>1118</sup>                                                                                                                         |
|      | C                                                                                                                               | Blue g: +/+; Nub-Gal4, Tub-Gal80 <sup>ts/+</sup> ; UAS-aPKC <sup>ΔN</sup> , UAS-Ras <sup>V12</sup> /+// h: w <sup>1118</sup><br>Red g: UAS-Hop <sup>TumL</sup> /+; Nub-Gal4, Tub-Gal80 <sup>ts</sup> /upd3 <sup>RNAi</sup> ; UAS-aPKC <sup>ΔN</sup> , UAS-Ras <sup>V12</sup> /upd2 <sup>RNAi</sup> // h: w <sup>1118</sup>                                                                                        |
|      | D                                                                                                                               | Blue Tub-Gal80 <sup>ts/+</sup> ; Mef2-Gal4/+<br>Red Tub-Gal80 <sup>ts/+</sup> ; Mef2-Gal4/UAS-upd2<br>Purple Tub-Gal80 <sup>ts</sup> /UAS-upd3; Mef2-Gal4/+                                                                                                                                                                                                                                                       |
|      | E                                                                                                                               | g: Nub-Gal4, Tub-Gal80 <sup>ts/+</sup> ; UAS-aPKC <sup>ΔN</sup> , UAS-Ras <sup>V12</sup> /+// h: +/+; Tub-Gal80 <sup>ts/+</sup> ; Moody-Gal4/+                                                                                                                                                                                                                                                                    |
|      | F                                                                                                                               | g: Nub-Gal4, Tub-Gal80 <sup>ts/+</sup> ; UAS-aPKC <sup>ΔN</sup> , UAS-Ras <sup>V12</sup> /+// h: STAT <sup>RNAi</sup> /+; Tub-Gal80 <sup>ts</sup> /STAT <sup>RNAi</sup> ; Moody-Gal4/+                                                                                                                                                                                                                            |
|      | G                                                                                                                               | Blue g: Nub-Gal4, Tub-Gal80 <sup>ts/+</sup> ; UAS-aPKC <sup>ΔN</sup> , UAS-Ras <sup>V12</sup> /+// h: 9-137-Gal4/+; Tub-Gal80 <sup>ts/+</sup><br>Red g: Nub-Gal4, Tub-Gal80 <sup>ts/+</sup> ; UAS-aPKC <sup>ΔN</sup> , UAS-Ras <sup>V12</sup> /+// h: 9-137-Gal4/Dome <sup>RNAi</sup> ; Tub-Gal80 <sup>ts/+</sup>                                                                                                 |
|      | H                                                                                                                               | Blue 9-137-Gal4/+; Tub-Gal80 <sup>ts/+</sup><br>Red 9-137-Gal4/Dome <sup>RNAi</sup> ; Tub-Gal80 <sup>ts/+</sup>                                                                                                                                                                                                                                                                                                   |
|      | I                                                                                                                               | Blue +/+; Tub-Gal80 <sup>ts/+</sup> ; Moody-Gal4/+<br>Red STAT <sup>RNAi</sup> /+; Tub-Gal80 <sup>ts</sup> /STAT <sup>RNAi</sup> ; Moody-Gal4/+                                                                                                                                                                                                                                                                   |
|      | J, K                                                                                                                            | Blue +/+; Tub-Gal80 <sup>ts/+</sup> ; Moody-Gal4/+<br>Red +/+; Tub-Gal80 <sup>ts</sup> /moody <sup>RNAi</sup> ; Moody-Gal4/+                                                                                                                                                                                                                                                                                      |
|      | L                                                                                                                               | Blue g: Nub-Gal4, Tub-Gal80 <sup>ts</sup> /upd3 <sup>RNAi</sup> ; UAS-aPKC <sup>ΔN</sup> , UAS-Ras <sup>V12</sup> /upd2 <sup>RNAi</sup><br>h: +/+; Tub-Gal80 <sup>ts/+</sup> ; Moody-Gal4/+                                                                                                                                                                                                                       |

|                                                                                                                        |   |                                                                                                                                                                                                               |
|------------------------------------------------------------------------------------------------------------------------|---|---------------------------------------------------------------------------------------------------------------------------------------------------------------------------------------------------------------|
|                                                                                                                        |   | <i>Red g: Nub-Gal4, Tub-Gal80<sup>ts</sup>/upd3<sup>RNAi</sup>, UAS-aPKC<sup>ΔN</sup>, UAS-Ras<sup>V12</sup>/upd2<sup>RNAi</sup><br/> h: UAS-Hom<sup>TumL/+</sup>; Tub-Gal80<sup>ts/+</sup>; Moody-Gal4/+</i> |
|                                                                                                                        |   | <i>Orange g: Nub-Gal4, Tub-Gal80<sup>ts/+</sup>; UAS-aPKC<sup>ΔN</sup>, UAS-Ras<sup>V12/+</sup><br/> h: UAS-Hom<sup>TumL/+</sup>; Tub-Gal80<sup>ts/+</sup>; Moody-Gal4/+</i>                                  |
|                                                                                                                        |   | <i>Purple g: w<sup>1118</sup><br/> h: UAS-Hom<sup>TumL/+</sup>; Tub-Gal80<sup>ts/+</sup>; Moody-Gal4/+</i>                                                                                                    |
| S4                                                                                                                     | A | <i>g: PBS// h: C57BL/6J</i>                                                                                                                                                                                   |
|                                                                                                                        | B | <i>g: B16-F10// h: C57BL/6J// treatment: PBS</i>                                                                                                                                                              |
|                                                                                                                        | C | <i>g: B16-F10// h: C57BL/6J// treatment: anti-IL6R</i>                                                                                                                                                        |
|                                                                                                                        | D | <i>Blue g: PBS// h: C57BL/6J</i>                                                                                                                                                                              |
|                                                                                                                        |   | <i>Red g: B16-F10// h: C57BL/6J// treatment: PBS</i>                                                                                                                                                          |
|                                                                                                                        |   | <i>Green g: B16-F10// h: C57BL/6J// treatment: anti-IL6R</i>                                                                                                                                                  |
|                                                                                                                        | E | <i>Blue g: PBS// h: w<sup>1118</sup></i>                                                                                                                                                                      |
| <i>Red g: Nub-Gal4, Tub-Gal80<sup>ts/+</sup>; UAS-aPKC<sup>ΔN</sup>, UAS-Ras<sup>V12/+</sup>// h: w<sup>1118</sup></i> |   |                                                                                                                                                                                                               |
